# Supplementary material for: Development and Evaluation of a Hospice and Palliative Care Music Therapy Education Program
Source: PubMed Central journal article supplement — Hanguk Hosupisu Wanhwa Uiryo Hakhoe Chi. 2020 Mar 1;23(1):17–26. doi: 10.14475/kjhpc.2020.23.1.17 (PMC10332708; doi:10.14475/kjhpc.2020.23.1.17), 2020-03-01
Supplement: KJHPC-23-017_Supple.pdf [file KJHPC-23-017_Supple.pdf]

## 호스피스 전문 음악치료사 양성 교육 프로그램 개발 및 평가

김은정, 이은정, 이청우\*, 최윤선\*

고려대학교 구로병원 호스피스·완화의료 센터, \*고려대학교 구로병원 가정의학과

## Development and Evaluation of a Hospice and Palliative Care Music Therapy Education Program

Eun Jung Kim, Ph.D., Eun Jeong Lee, R.N., Chung-Woo Lee, M.D.\* and  
Youn Seon Choi, M.D., Ph.D.\*

Hospice & Palliative Care Center, Korea University Guro Hospital, \*Department of Family Medicine,  
Korea University Guro Hospital, Seoul, Korea

**Purpose:** This study was conducted to develop a hospice music therapist training program and to evaluate its effects. **Methods:** The educational program consisted of training on the theory of hospice and the theory and practice of hospice music therapy. The course lasted for 4 weeks, with 8 hours of training per week, and 33 music therapists completed the course. In order to assess the effectiveness of the course, participants' knowledge and confidence regarding hospice music therapy and readiness for hospice music therapy before and after education were measured. The statistical analysis was done using SPSS version 18.0 and the paired t-test was used to assess the effectiveness of the program. **Results:** The trainees showed significant improvements in knowledge ( $P < 0.001$ ) and confidence ( $P < 0.001$ ) in all areas of this course, as well as in readiness for hospice music therapy ( $P < 0.001$ ). Participants' satisfaction with the lectures was assessed using a 5-point Likert scale. The average score for all lecture areas exceeded 4 (yes), and the satisfaction level was mostly high. Students were most satisfied with the lectures on music therapy theory, followed in order by those on music therapy practice and hospice theory. **Conclusion:** This hospice music therapist training program is considered to be suitable because of its positive educational effects and the high satisfaction of participants with the lectures. In order to provide high-quality music therapy services to patients and their families, this training course should be regularly offered to cultivate competent music therapists, and the content of the education should be standardized and applied in various clinical settings.

**Key Words:** Music therapy, Hospice care, Palliative care, Education

**Received** December 16, 2019

**Revised** January 28, 2020

**Accepted** February 3, 2020

### Correspondence to

Youn Seon Choi  
Department of Family Medicine,  
Korea University Guro Hospital, 148  
Gurodong-ro, Guro-gu, Seoul 08308,  
Korea  
Tel: +82-2-2626-3275  
Fax: +82-2-837-9274  
E-mail: younseon@korea.ac.kr

## 서론

우리나라의 호스피스 이용률 및 지정 기관의 수는 지난 10여

년간 꾸준히 증가해오고 있다(1). 여기에 더해 보건복지부는 가정형, 자문형, 소아청소년형 등 다양한 호스피스 유형을 추가하고 대상 기관을 확대하는 '제1차 호스피스·연명의료 종합계획

(2019~2023)'의 추진을 발표 하였다(2). 국내의 호스피스 완화 의료(이하 호스피스) 전문기관에서 시행되는 음악치료는 2015년 7월 입원형 호스피스 건강보험 수가의 일당 정액 항목에 요법 치료가 포함되면서 제도권에 편입되었다(3). 음악치료를 제공하고 있는 호스피스 전문기관의 정확한 수는 아직 공식적으로 집계되고 있지 않으나 학술대회 등에서 발표된 개별 조사 데이터에는 음악치료 제공 기관의 수가 과거 대비 증가한 것으로 나타났다. 호스피스 지정 기관의 지속적인 증가에 따라 음악치료 신규 도입 기관 역시 함께 늘어날 것으로 보이며, 기존에 입원형 호스피스를 중심으로 음악치료를 제공하고 있는 기관에서도 가정형, 자문형 등 추가되는 호스피스 유형에까지 음악치료를 확대 시행하면서 음악치료의 수요는 더욱 증가할 것으로 예상된다.

늘어나는 호스피스 음악치료의 수요에 능동적으로 대응하고 환자 가족에게 보다 효과적인 음악치료 중재를 제공하기 위해서는 호스피스에 대한 깊은 이해와 대상자 개개인에게 적합한 중재를 즉각적으로 적용할 수 있는 역량을 지닌 호스피스 전문 음악치료사들을 지속적으로 양성하여 기관에 배치해야 한다. 그러나 현재 호스피스 전문기관의 음악치료사 자격 요건은 음악치료 자격증 보유 여부 외에는 구체적으로 정해진 기준이 없다. 문제는 우리나라의 음악치료 관련 자격은 국가자격이나 국가공인민간 자격이 없으며, 심사 없이 신고만으로 등록 가능한 민간등록자격만 존재한다는 점이다. 우리나라의 음악치료사 관련 자격 현황을 조사한 연구에 따르면, 2013년 기준 한국직업능력개발원의 민간 자격정보서비스에 등록된 음악치료 관련 자격은 40개 기관에서 발급하는 52개 종류가 있었으며, 자격의 명칭은 총 26개로 확인되었다(4). 특히 자격의 명칭은 의료법에 의해 '치료'라는 용어를 사용할 수 없기 때문에 2012년을 전후로 '음악심리상담사', '음악심리상담지도사' 등의 명칭으로 된 자격증이 급증한 것으로 나타나고 있다(5). 자격의 명칭은 유사하거나 동일하지만 발급 기관에 따라 음악치료 학위와 실습 시간 등의 엄격한 기준을 충족해야만 응시 자격이 주어지는 주요 음악치료 학회 발급 자격에서부터, 온라인 교육만으로도 취득이 가능한 일반 기관 및 개인 발급 자격까지 취득 요건과 수준에 큰 격차가 있다. 따라서 음악치료사를 채용하는 호스피스 전문기관에서는 단순히 자격증의 보유 여부만으로는 지원자의 역량 수준을 객관적으로 파악할 수 없기 때문에 질 높은 음악치료사를 선별하는데 어려움을 겪을 수 있다.

호스피스 음악치료사는 특히 환자의 필요를 최대한 반영한 환자 중심적 접근과 임종 지지에 어려움을 경험하고 있다(6). 호스피스 대상자는 음악치료 전공 과정에서 주로 다루는 발달장애나 재활 영역의 대상자와는 전혀 다른 특수성이 있기 때문에 음악치료 전공 학위와 공신력 있는 학회의 자격을 보유한 음악치료사와

하더라도 호스피스에 대한 교육과 훈련을 받지 않은 상태에서 호스피스 대상자에게 음악치료를 제공하는 것은 어려운 일이다. 따라서 국가전문자격을 보유한 의사, 간호사, 사회복지사 등 호스피스 필수 인력들의 호스피스 서비스 질 향상을 위해 호스피스 표준교육(이하 표준교육) 과정이 필요한 것과 마찬가지로, 음악치료 학위와 자격을 보유한 음악치료사들에게도 호스피스에 대한 이해와 음악치료 실무 역량을 강화할 수 있는 교육 프로그램이 필요하다. 하지만 아직 국내에는 호스피스 전문 간호 대학원과 같은 호스피스 전문 음악치료 학위 과정이나 교육 프로그램이 없는 것으로 알려져 있다. 표준교육 역시 교육 대상 및 내용 구성이 의사, 간호사, 사회복지사 등 필수인력을 대상으로 설계되어 있어 음악치료사들에게는 참여 기회가 없거나 제한적으로 주어지고 있다.

호스피스 음악치료는 환자의 신체적, 심리사회적, 영적 측면을 고려하여 접근해야 한다(7). 환자들이 경험하는 고통은 환자마다 다르기 때문에 호스피스 음악치료사는 환자 개개인의 상태와 필요를 면밀히 분석하여 중재를 계획하고 수행할 수 있어야 한다(8). 또한 대상자의 욕구를 이끌어 낼 수 있는 카운슬링 역량과 이를 충족시킬 수 있는 능동적 대처 기술을 필요로 한다(9). 보다 효과적인 음악치료를 위해서는 호스피스에 대한 이해를 바탕으로 환자가 선호하는 음악을 중심(11)으로 라이브로 연주하고 노래하며 중재를 적용할 수 있어야 한다(10). 준비되지 않은 치료 인력은 대상자에게 부정적인 영향을 끼칠 위험이 있을 뿐만 아니라, 치료효과도 감소될 가능성이 있다. 게다가 치료에 대한 기대를 갖고 있던 일반인의 신뢰를 저버리게 되어 치료영역 전반의 발전을 저해할 소지가 많다(12). 이와 같은 부정적 영향의 가능성을 최소화하기 위해서는 숙련된 전문 인력을 중심으로 중재가 제공되어야 하며, 숙련된 호스피스 완화의료 전문가 양성을 위해서는 이론교육과 실무교육이 병행되어야 한다(13). 따라서 호스피스 전문 음악치료사를 체계적으로 양성하고 공급하기 위해서는 임상 현장에서 필요한 필수 역량 기준 제시와 효과적인 음악치료 중재를 위한 가이드라인을 포함한 교육 과정이 필요하다.

보건복지부는 '제1차 호스피스·연명의료 종합계획(2019~2023)'의 추진 과제의 하나로 '호스피스 서비스 전문성 및 질 향상'을 선정하였다. 이에 중앙호스피스센터에서는 호스피스 전문교육의 기회가 부족한 돌봄제공자의 질 향상을 위해 '호스피스 완화의료 분야별 돌봄 제공자 양성과정 운영'사업을 모집하였다. 이와 같은 양성과정은 기존의 전문가 실무 멘토링 대비 많은 인원에게 다양한 교육 방법 및 실습을 제공할 수 있다(14). 본 연구에서는 '호스피스 전문 음악치료사 양성과정'에 참여하여 교육을 수료한 음악치료사들의 과정 평가 결과를 분석하여 교육의 효과 및 만족도를 확인하고 향후 호스피스 음악치료사 교육에 필요한

기초자료를 마련하고자 하였다. 구체적인 연구 목적은 다음과 같다.

1) 호스피스 전문 음악치료사 양성을 위한 교육 프로그램을 개발한다.

2) 개발된 교육 프로그램이 음악치료사들의 ‘호스피스 음악치료에 대한 지식 및 자신감’, ‘호스피스 음악치료 수행을 위한 준비정도’에 미치는 효과와 교육 프로그램의 만족도를 평가한다.

## 대상 및 방법

### 1. 연구 설계

본 연구는 ‘호스피스 전문 음악치료사 양성과정’에 참여한 음악치료사를 대상으로 교육 전후에 실시한 설문 조사 결과를 비교하

여 양성과정의 효과를 확인하기 위해 단일집단 사전-사후 실험 설계를 사용하였다.

### 2. 연구 대상 및 자료 수집

#### 1) 연구 대상

본 연구의 대상자는 ‘호스피스 전문 음악치료사 양성과정’에 참여하여 교육을 수료한 음악치료사들이다. 양성과정의 지원 자격은 현직 음악치료사로서 호스피스 전문기관에 현재 근무하고 있거나, 과거 근무 경험이 있는 자, 또는 향후 호스피스 전문기관에 근무할 계획으로 호스피스 표준교육을 수료한 자로 제한하였다. 선발된 음악치료사를 대상으로 매주 8시간씩 4주간 교육이 진행되었으며, 과정을 수료하여 본 연구의 대상에 포함된 음악치료사는 총 33명이다.

Cohen (15)은 두 집단 평균에 대한 t-test의 효과크기는 0.20일

Table 1. The Major Subjects of Hospice and Palliative Care Music Therapy Certificate Program.

| Category                                                 | Content                                                                                                                                                                                                                                                                                                                                                                                                                                                                                                                                                     |
|----------------------------------------------------------|-------------------------------------------------------------------------------------------------------------------------------------------------------------------------------------------------------------------------------------------------------------------------------------------------------------------------------------------------------------------------------------------------------------------------------------------------------------------------------------------------------------------------------------------------------------|
| Hospice & palliative care music therapy (34 hrs)         | Philosophical and historical perspectives on hospice & palliative care<br>Ethics in hospice & palliative care<br>Clinical needs of persons with advanced illness<br>Music therapy in hospice care evolution and growth<br>Pediatric palliative care music therapy<br>Referrals & assessments<br>Music therapy to meet clinical care plans<br>Hospice music therapy song swap<br>Music therapy to prevent hospice interdisciplinary team compassion fatigue<br>The business of hospice music therapy<br>Macro-assessments: business planning; funding issues |
| Counseling skills for music therapists (26 hrs)          | Communicating with patients and families: setting the scene<br>Getting in the door: Introduction of music therapy to hospice patients/ families<br>Models of counseling: an overview<br>Vent-validation-problem solving<br>More counseling techniques<br>Suicide risk assessment<br>Music in counseling<br>Processing role plays/music therapy clinical supervision                                                                                                                                                                                         |
| Adult and seniors grief & loss music therapy (25 hrs)    | Philosophical approaches to counseling grief & loss<br>Review skills needed to work in bereavement<br>Needs of grieving adults and seniors<br>Music therapy-based group curriculum for adult and senior bereavement groups;<br>special populations<br>Multi-generational experiences                                                                                                                                                                                                                                                                        |
| Child and adolescent grief & loss music therapy (23 hrs) | Dyads: personal childhood death experiences and songwriting<br>Child and adolescent grief: developmental stages, approaches to treatment, assessments, and research overview<br>Child and adolescent bereavement curriculum and treatment interventions<br>Developing session plans for role-playing<br>Sharing interventions for overcoming guilt and shame                                                                                                                                                                                                |

경우 small, 0.50일 경우 medium, 그리고 0.80일 경우 large라고 정의하였다. 본 연구에서는 이에 근거하여 효과크기를 0.8로 설정하였다. G-power 3.1.9.2 프로그램에서 효과크기 0.8, 유의수준  $\alpha$ 는 0.05, 검정력 0.95, 양측검정 방법으로 대응표본 t-test로 설정했을 때 필요한 최소 표본 수는 총 23명으로 산출되었다. 따라서 본 연구에서는 충분한 표본 수를 확보한 것으로 판단하였다.

## 2) 교육 프로그램 개발

본 연구의 ‘호스피스 전문 음악치료사 양성과정’ 교육 프로그램은 교수체제개발 모형인 ADDIE 모형을 참고하여 분석(Analysis), 설계(Design), 개발(Development), 실행(Implementation), 평가(Evaluation) 단계에 따라 개발하였다.

분석 단계에서는 평소 전문가 실무 멘토링 과정에서 취합된 각 기관의 음악치료사 역량에 관한 요구 수준과 내용을 정리하고, 중앙호스피스센터의 표준교육과정 및 미국의 Hospice and Palliative Care Music Therapy (HPMT) 자격 교육과정(16)을 분석하였다(Table 1).

설계 단계에서는 교육의 목표를 호스피스에 대한 이해와 음악

치료 중재 역량을 갖춘 호스피스 전문 음악치료사의 양성으로 설정하였다. 그리고 앞서 분석 단계에서 수행한 표준교육 과정과 미국의 HPMT 자격 과정의 분석내용을 참고하여 교육 목표를 달성하기 위해 필요한 교과목들을 도출하였다. 여기에 더해 효과성이 검증된 호스피스 음악치료 프로토콜(8)을 포함하여 교육 커리큘럼을 구성하였다.

개발 단계에서는 먼저 예산, 사업기간, 교육 범위, 목표 수료인원 등을 고려하여 교육 계획안을 작성하였다. 작성된 교육 계획안은 의사, 간호사, 사회복지사 등 호스피스 전문 인력으로 구성된 전문가 그룹으로부터 교육 내용, 강사진 구성 계획, 강의법 등의 적절성 여부에 대한 검토를 받아 수정 및 보완되었다. 이어서 양성과정 운영팀에서 과정 평가 계획 및 세부 추진 일정을 포함한 양성과정 운영 계획을 수립하였다. 이후 중앙호스피스의 검토를 거쳐 최종적으로 교육 과정을 확정하였다(Table 2).

실행 단계에서는 호스피스 전문 인력과 음악치료사, 영적돌봄자, 그리고 대학교 교수로 강사진을 구성하여 교육을 제공하였다. 전문 이론 및 실습 교육 강의는 해당 분야의 전문가로서 석사 이상의 학력과 10년 이상의 임상 경험이 있는 의사, 간호사, 음악

Table 2. Hospice and Palliative Care Music Therapy Curriculum.

| Category                       | Course objectives                                                                                           | Content                                                      | Method                    | Time (hrs) |
|--------------------------------|-------------------------------------------------------------------------------------------------------------|--------------------------------------------------------------|---------------------------|------------|
| Hospice theory                 | Learn philosophical and historical perspectives on hospice and palliative care                              | Understanding hospice and palliative care                    | Lecture                   | 1          |
|                                | Understand hospice patients and their families and learn how to communicate with them                       | Music therapy program in hospice                             | Lecture                   | 1          |
|                                | Understand how the interdisciplinary team works together and the role of music therapy in hospice setting   | Care planning by hospice type and interdisciplinary team     | Lecture                   | 1          |
|                                |                                                                                                             | Spiritual care                                               | Lecture                   | 2          |
|                                |                                                                                                             | Hospice communication and counseling                         | Lecture                   | 1          |
|                                |                                                                                                             |                                                              |                           |            |
| Hospice music therapy theory   | Learn the concepts and procedures of music therapy in hospice care                                          | Sharing experience in hospice music therapy                  | Lecture, discussion       | 1          |
|                                | Learn to identify the clinical needs of patients and create music therapy interventions to meet those needs | Hospice music therapy overview                               | Lecture                   | 2          |
|                                |                                                                                                             | Hospice music therapy protocols (1/2/3)                      | Lecture                   | 5          |
|                                | Identify the physical, psychological, social and spiritual needs of grieving adults and children            | Music therapy for bereavement group                          | Lecture                   | 1.5        |
|                                | Recognize the multiple and practical uses of music therapy in hospice                                       | Pediatric palliative care music therapy                      | Lecture                   | 1.5        |
|                                |                                                                                                             | Hospice music therapy in foreign countries                   | Lecture                   | 1.5        |
|                                |                                                                                                             | Various uses of music therapy in hospice setting             | Lecture                   | 1.5        |
| Hospice music therapy practice | Practice skills under supervision in a clinical setting                                                     | Use of musical instrument suitable for hospice music therapy | Lecture, practice         | 1.5        |
|                                | Analyze practical cases for clinical reference and use                                                      | Practice for hospice music therapy protocols                 | Role play, supervision    | 1.5        |
|                                | Practice musical instrument skills and share repertoires to enhance technical competence                    |                                                              |                           |            |
|                                |                                                                                                             | Case study: best practices                                   | Case study                | 2          |
|                                |                                                                                                             | Hospice music therapy repertoires                            | Lecture, discussion       | 2          |
|                                |                                                                                                             | Clinical practice and supervision                            | Presentation, supervision | 2          |

치료사, 영적돌봄자와 해당 분야 강의 경력이 7년 이상인 음악치료학 교수, 심리상담학 교수가 담당하였다. 요법 운영 절차 및 사례 등 실무를 소개하는 일부 강의는 해당 업무 경력 2년 이상의 사회복지사, 음악치료사 등 실무 담당자들이 진행하였다. 교육은 매주 8시간씩 4주간 총 32시간이 제공되었으며 33명의 음악치료사가 수료하였다.

평가 단계에서는 표준교육의 평가도구와 선행연구를 참고하여 만든 도구를 사용하였다. 교육을 수료한 음악치료사의 변화를 확인하기 위해 교육 사전-사후에 평가를 실시하였으며, 각 강의에 대한 만족도를 확인하기 위해 강의 만족도 평가를 진행하였다.

### 3) 자료 수집

‘호스피스 전문 음악치료사 양성과정’ 교육은 매주 8시간씩 4주간 총 32시간에 걸쳐 19개의 강의가 제공되었다. 교육 참여의 효과를 측정하기 위한 사전-사후 설문은 지식, 자신감, 그리고 준비정도를 묻는 동일한 문항으로 구성하여 전체 과정 전후에 각 1회씩 진행하였고, 강의 만족도를 측정하기 위한 설문은 19개의 강의 모두에 대해 진행하였다. 따라서 교육에 참여한 음악치료사들은 1주차 첫 강의 시작 전에 사전 설문지에 응답하였고, 4주차 마지막 강의 종료 후에 사후 설문지에 응답하였다. 또한 19개 강의에 대해 매 강의 종료 후에 해당 강의에 대한 만족도 설문지에 응답하였다. 사전-사후 설문의 경우는 33명의 음악치료사 모두의 응답지가 확보되었으나, 강의 만족도 설문의 경우 지각, 조퇴 등의 출결 차이로 인해 강의 별로 설문 응답지 수에 차이가 있다.

## 3. 연구 도구

호스피스 음악치료사의 역량 측정을 위한 도구는 아직 개발 및 검증된 도구가 존재하지 않는다. 따라서 본 연구에서는 ‘호스피스 전문 음악치료사 양성과정’의 교육 효과를 확인하기 위해 측정해야 할 항목들을 정의하고, 이를 측정할 수 있는 도구를 교육 프로그램과 함께 개발하였다. 먼저 이미 호스피스 분야와 음악치료 분야에서 개발 또는 사용되고 있는 기존의 도구들 중에서 교육의 효과 측정과 호스피스 음악치료사의 역량 측정에 적합한 도구들을 수집하였다. 다음으로 수집된 도구들의 측정 항목 중에서 본 양성과정의 교육 영역에 적합한 측정 항목들을 도출하고, 이를 교육 커리큘럼에 맞게 수정 및 보완하여 측정도구 초안을 작성하였다. 작성된 초안은 본 양성과정의 개발 및 운영을 위해 의사, 간호사, 사회복지사, 음악치료사 등 다학제로 구성된 팀에서 두 차례의 검토 및 보완을 진행한 후 최종 측정 도구로 확정되었다. 각 도구의 세부 항목 및 신뢰도는 다음과 같다.

### 1) 호스피스 음악치료 지식 및 자신감

호스피스 음악치료의 지식 및 자신감의 측정은 호스피스 표준교육(17) 과정에서 사용되고 있는 설문지 문항 중 ‘호스피스 완화의료 각 영역에 대한 지식’ 문항과 ‘호스피스 완화의료 각 실무영역에 대한 자신감’ 문항의 세부 항목을 수정하여 사용하였다. 즉, 표준교육 설문지 문항의 ‘교육 영역’과 ‘기술 영역’의 세부 항목들을 본 양성과정에서 제공한 교육 영역으로 대체하였으며, 지식과 자신감 모두 동일하게 15개 항목으로 작성되었다. 측정 방법은 지식은 ‘많이 알고 있음’ 5점, ‘전혀 모름’ 1점을 부여하였고, 자신감은 ‘매우 자신 있음’ 5점, ‘전혀 자신 없음’ 1점을 부여하였다. 여기에 더해 지식과 자신감에 대해 변화된 내용을 자유롭게 기술할 수 있도록 각각에 대한 개방형 질문을 1개씩 추가하였다. 도구의 신뢰도 분석 결과 Cronbach's  $\alpha$ 는 지식이 0.67~0.93 (호스피스 이론 0.86, 음악치료 이론 0.93, 음악치료 실습 0.67), 자신감은 0.84~0.96 (호스피스 이론 0.93, 음악치료 이론 0.96, 음악치료 실습 0.84)으로 나타났다.

### 2) 호스피스 음악치료 수행을 위한 준비정도

호스피스 음악치료 수행을 위한 준비정도의 측정은 표준교육 설문지의 ‘호스피스 완화의료 실무 수행을 위한 준비정도’ 문항을 ‘호스피스의 이해’, ‘자기분석’, ‘환자분석 및 중재계획’, ‘중재진행’, ‘자기계발’의 5개 영역 33개 항목으로 세분화하여 측정하였다. 5개 영역 중 ‘호스피스의 이해’, ‘자기분석’, ‘자기계발’의 3개 영역은 ‘2014년 보건복지부 지정 54개 호스피스·완화의료 기관 내 음악치료 현황’(18) 연구에서 사용된 설문지 내용 중 음악치료사의 음악치료 진행 및 개인역량에 관한 문항들을 18개 항목으로 구체화하여 작성하였다. ‘환자분석 및 중재계획’, ‘중재진행’의 항목들은 ‘호스피스 말기암환자를 위한 음악치료 프로토콜 개발 및 효과검증’(8) 연구에서 개발된 음악치료 프로토콜의 분석도구인 ‘환자 상태분석’과 ‘음악치료 적용 계획서’에 제시된 음악치료사의 수행항목 15개를 정의하여 작성하였다. 측정 방법은 ‘매우 그렇다’ 5점, ‘전혀 아니다’ 1점을 부여하였다. 도구의 신뢰도 분석 결과 Cronbach's  $\alpha$ 는 0.74~0.93 (호스피스 이해 0.93, 자기분석 0.86, 환자분석 및 중재계획 0.91, 중재진행 0.76, 자기계발 0.74)으로 나타나 연구도구의 신뢰도 수준이 양호한 것으로 나타났다.

### 3) 강의 만족도

양성과정에서 제공한 19개 강의에 대한 만족도 조사는 호스피스 표준교육에서 사용하는 ‘강의평가지’의 11개 항목을 그대로 사용하였으며, 표준교육 평가지의 4단계 척도는 5단계 척도로 변경하였다. 도구의 신뢰도 분석 결과 Cronbach's  $\alpha$ 는 0.96~0.97

(호스피스 이론 0.97, 음악치료 이론 0.97, 음악치료 실습 0.96)로 나타나 연구도구의 신뢰도 수준이 양호한 것으로 나타났다.

#### 4. 자료 분석

‘호스피스 전문 음악치료사 양성과정’의 효과 및 교육의 만족도를 평가하기 위해 사전-사후 설문지의 교육 영역과 19개의 강의를 ‘호스피스의 이해’, ‘호스피스 음악치료 이론’, ‘호스피스 음악치료 실습’으로 분류하여 통합 측정하였다.

본 연구에서 사용한 연구도구에서 하위영역을 포함한 모든 척도에서 왜도  $\pm 3$ , 첨도  $\pm 10$ 을 넘지 않아 척도의 정규성이 검증되었으며, 추가적으로 사용한 Shapiro-Wilk 정규성 검정에서도  $P > 0.05$ 로 나타나 정규성이 검증되었다. 따라서 본 연구에서는 분석을 위해 모수검정 통계방법을 사용하였다.

자료처리에 사용된 프로그램은 SPSS 18.0 Version이며 연구의 목적에 따라 아래와 같이 분석하였다.

첫째, 조사대상자의 일반적 특성을 설명하기 위해서 기술통계를 실시하였다.

둘째, 양성과정의 교육 효과를 확인하기 위해 대응표본 t검증(Paired t-test)을 사용하였다.

분석을 실시하여 유의도가  $P < 0.05$ 인 경우는 통계적으로 의미가 있는 것으로 해석하였다.

## 결과

### 1. 호스피스 전문 음악치료사 양성과정의 교육 효과

호스피스 전문 음악치료사 양성과정 수료 음악치료사의 사전-사후 응답을 분석한 결과, 호스피스 음악치료 지식 및 자신감, 그리고 호스피스 음악치료 수행을 위한 준비정도에서 사전-사후 간 유의미한 점수 향상이 있는 것으로 확인되었다(Table 3).

#### 1) 호스피스 음악치료 지식

호스피스 음악치료 지식에 관한 응답 분석 결과 ‘호스피스 이론’ 영역( $t = -6.048$ ,  $P < 0.001$ ), ‘음악치료 이론’ 영역( $t = -7.793$ ,  $P < 0.001$ ), ‘음악치료 실습’ 영역( $t = -6.634$ ,  $P < 0.001$ )이 유의미한 향상을 보였다. 교육 후 호스피스 음악치료의 지식수준이 어떻게 변화되었는지 구체적인 설명을 요구한 개방적 질문에는 다음과 같은 응답들이 있었다.

프로토콜 학습을 통해 좀 더 체계적 세션 진행이 가능할 것으로 사료된다.

전반적인 음악치료 대상자를 위한 지식은 있었으나, 호스피스 대상자를 위한 지식이 매우 부족했는데 이론적 지식을 습득할 수 있었다.

프로토콜에 맞춰 세션을 구성하고 진행하고 평가해야 함을 알게 되었다. 나의 세션을 수정하려고 한다.

호스피스 완화의료에 대한 전반적인 이해가 늘어났고 특히 프

Table 3. Effects of the Hospice and Palliative Care Music Therapy Education Program (N=33).

| Variables  |                                | Pre             | Post            | t      | P      |
|------------|--------------------------------|-----------------|-----------------|--------|--------|
|            |                                | M $\pm$ SD      | M $\pm$ SD      |        |        |
| Knowledge  | Hospice theory                 | 2.98 $\pm$ 0.70 | 3.92 $\pm$ 0.58 | -6.048 | <0.001 |
|            | Hospice music therapy theory   | 2.52 $\pm$ 0.65 | 3.75 $\pm$ 0.59 | -7.793 | <0.001 |
|            | Hospice music therapy practice | 2.89 $\pm$ 0.74 | 3.92 $\pm$ 0.60 | -6.634 | <0.001 |
|            | Total                          | 2.80 $\pm$ 0.64 | 3.86 $\pm$ 0.53 | -7.440 | <0.001 |
| Confidence | Hospice theory                 | 2.75 $\pm$ 0.74 | 3.61 $\pm$ 0.58 | -6.057 | <0.001 |
|            | Hospice music therapy theory   | 2.47 $\pm$ 0.70 | 3.51 $\pm$ 0.64 | -6.741 | <0.001 |
|            | Hospice music therapy practice | 2.73 $\pm$ 0.83 | 3.64 $\pm$ 0.69 | -5.512 | <0.001 |
|            | Total                          | 2.65 $\pm$ 0.72 | 3.58 $\pm$ 0.60 | -6.534 | <0.001 |
| Readiness  | Understanding hospice          | 3.13 $\pm$ 0.75 | 3.77 $\pm$ 0.54 | -4.615 | <0.001 |
|            | Self analysis                  | 3.31 $\pm$ 0.54 | 4.05 $\pm$ 0.58 | -6.024 | <0.001 |
|            | Patient analysis               | 3.10 $\pm$ 0.68 | 3.92 $\pm$ 0.66 | -5.452 | <0.001 |
|            | and intervention planning      |                 |                 |        |        |
|            | Intervention delivery          | 3.12 $\pm$ 0.47 | 3.64 $\pm$ 0.62 | -3.761 | <0.01  |
|            | Self-improvement               | 4.19 $\pm$ 0.49 | 4.49 $\pm$ 0.55 | -2.365 | <0.05  |
|            | Total                          | 3.37 $\pm$ 0.45 | 3.98 $\pm$ 0.50 | -5.696 | <0.001 |

로토콜교육이 유의했다. 환자의 필요를 잘 사정해서 치료하는 방향성을 잡게 되었고 호스피스에서 음악치료의 영역을 점점 넓혀갈 수 있다는 것을 알게 되었다.

음악치료 이외에 호스피스 완화의료 개관이나 영적 돌봄과 같은 주제들에 대해 교육 받은 것이 도움이 되었다.

좀 더 체계적이고 전문적으로 접근할 수 있는 방법이 있다는 것을 알게 되었다. 그룹보다 개인으로 접근해서 다양한 이슈와 필요들을 확인하고 해결할 수 있다는 것도 알게 되었다.

## 2) 호스피스 음악치료 자신감

호스피스 음악치료 자신감에 관한 응답 분석 결과 ‘호스피스 이론’ 영역( $t=-6.057$ ,  $P<0.001$ ), ‘음악치료 이론’ 영역( $t=-6.741$ ,  $P<0.001$ ), ‘음악치료 실습’ 영역( $t=-5.512$ ,  $P<0.001$ )이 유의미한 향상을 보였다.

호스피스 음악치료의 실무에 대한 자신감이 어떻게 변화되었는지 구체적인 설명을 요구한 개방적 질문에는 다음과 같은 응답들이 있었다.

교육을 통해 배운 내용을 실제 호스피스 임상현장에서 접목을 해보았을 때, 환자의 반응이 좋았으며 무엇보다 치료를 하고 있는 내 자신이 행복하다고 느꼈다.

호스피스에 대한 배경지식과 대상자 특성에 따른 적용을 교육 받은 후 앞으로 실무에서 바로 활용할 수 있을 것이라는 자신감이 생겼다. 프로토콜을 통해 호스피스 음악치료의 틀을 제공 받았다.

프로토콜을 사용하여 더욱 전문적이고 체계적으로 음악치료 접근을 할 수 있는 계기가 되었고 현재 일하고 있는 기관에서 음악치료의 중요함을 알게 되었다.

호스피스 음악치료의 방향성을 잡게 된 것 같고 앞으로 환자의 각 필요에 맞게 중재를 할 수 있을 것 같다. 여러 가지 중재 사례들도 많은 도움이 되어 응용, 적용할 수 있을 것 같다.

교육을 같이 받는 동기들 앞에서 직접 프로토콜대로 음악치료 접근을 시도해보니 여러 피드백을 받을 수 있어서 값진 경험이었다.

## 3) 음악치료 수행을 위한 준비정도

음악치료 수행을 위한 준비정도에 관한 응답 분석 결과 ‘호스피스 이해’ 영역( $t=-4.615$ ,  $P<0.001$ ), ‘자기분석’ 영역( $t=-6.024$ ,  $P<0.001$ ), ‘환자분석 및 중재계획’ 영역( $t=-5.452$ ,  $P<0.001$ ), ‘중재진행’ 영역( $t=-3.761$ ,  $P<0.01$ ), ‘자기계발’ 영역( $t=-2.365$ ,  $P<0.05$ )이 유의미한 향상을 보였다.

## 2. 호스피스 전문 음악치료사 양성 교육 강의 만족도

‘호스피스 이론’ 강의에 대하여 평균 4.28점( $\pm 0.70$ ), ‘음악치료 이론’ 강의에 대하여 평균 4.63점( $\pm 0.53$ ), ‘음악치료 실습’ 강의에 대하여 평균 4.61점( $\pm 0.50$ )으로 평가하였다. 모든 강의 영역의 평균이 평균 4점(그렇다)의 수준을 넘어 호스피스 전문 음악치료사 양성과정 강의를 수강한 대상자들의 강의 만족도 수준이 대부분 양호한 것으로 확인되었으며, 특히 ‘음악치료 이론’, ‘음악치료 실습’, ‘호스피스 이론’의 순으로 강의에 대하여 높은 만족도를 보이는 것으로 확인되었다(Table 4).

## 고찰

본 연구는 2018년 중앙호스피스센터에서 진행한 ‘호스피스 완화의료 분야별 돌봄 제공자 양성과정 운영’ 사업 중 하나인 ‘호스피스 전문 음악치료사 양성과정’ 참여 음악치료사들의 교육 평가 결과를 분석하여 교육의 효과 및 만족도를 확인하고, 향후 호스피스 음악치료사 교육에 필요한 기초자료를 마련하고자 하였다.

교육에 참여한 음악치료사 33명 가운데 호스피스 음악치료 교육을 받은 경험이 있다고 응답한 음악치료사는 14명이었다. 그러나 이 중 12명은 표준교육에 포함된 호스피스 음악치료를 수강한 것이며, 그 외 2명은 일반음악치료 교육 커리큘럼 중 호스피스에서의 음악치료에 관한 강의가 일부 포함된 경우에 해당했다. 따라서 호스피스 음악치료를 주제로 구성된 교육을 받았거나 호스피스 음악치료 양성을 위한 교육 과정에 참여한 경험이 있는 음악치료사는 없는 것으로 간주해도 될 것으로 판단된다.

본 양성과정의 교육 사전-사후 평가 결과, 교육완료 후에 지식, 자신감, 준비정도의 모든 영역에서 유의미한 향상이 있는 것으로 나타났다. 대상자가 이미 동일한 교육을 받은 경험이 있는 경우 교육 전후에 유의한 향상이 나타나지 않을 수 있으나(19), 본 연구에서의 참여자는 대다수가 호스피스 또는 호스피스 음악치료 관련 교육을 받은 경험이 전혀 없거나 일반적인 개론 수준의 강의를 수강한 경험이 전부였기 때문에 ‘호스피스 전문 음악치료사 양성과정’의 교육 대부분이 처음 학습한 내용이었으며, 따라서 모든 영역에서 유의미한 향상이 나타날 수 있었던 것으로 추정된다.

**Table 4.** Levels of Satisfaction with the Hospice and Palliative Care Music Therapy Education Program.

| Variables                      | N   | M $\pm$ SD      |
|--------------------------------|-----|-----------------|
| Hospice theory                 | 154 | 4.28 $\pm$ 0.70 |
| Hospice music therapy theory   | 303 | 4.63 $\pm$ 0.53 |
| Hospice music therapy practice | 137 | 4.61 $\pm$ 0.50 |

교육 참여 음악치료사들의 개방형 질문에 대한 응답을 살펴보면 이번 교육을 통해 호스피스에 대한 이해의 수준이 높아졌으며, 일반 음악치료 대비 호스피스 음악치료의 특성을 인지하게 된 것으로 보인다. 이 같은 결과는 Choi와 Kwon (20)의 연구에서 교육을 통해 호스피스에 대한 인식과 임종환자 돌봄에 대한 태도가 향상된 것으로 확인된 호스피스 완화의료 도우미 교육 프로그램의 효과와도 일치한다. 특히 다수의 음악치료사들이 호스피스 음악치료 프로토콜을 활용하여, 대상자의 필요를 파악하여 분석적이고 체계적인 음악치료를 적용할 수 있을 것이라고 평가하였다. 이는 기준으로 삼을 만한 호스피스 음악치료의 표준 가이드 없이 임상현장에서 음악치료를 수행하며 겪은 시행착오와 어려움들을 프로토콜 교육을 통해 상당 부분 해결할 수 있었기 때문인 것으로 보인다.

교육의 평가 결과를 살펴보면 유의미한 효과와 더불어 강의에 대한 만족도 또한 높은 것으로 나타났다. 이는 본 교육과정의 다 음과 같은 특징에서 기인한 것으로 판단된다.

첫째, 내용적 측면에서는 호스피스 이론과 함께 호스피스 음악 치료의 이론 및 실습을 모두 포함한 통합 교육의 형태로 제공되었다. 호스피스 질적 향상을 위해서는 이론중심의 교육과정과 함께 실무수행역량과 자신감을 향상시키기 위한 실무 중심 훈련이 필요하다(13).

둘째, 형식적 측면에서는 강의, 토의, 역할연기, 실습 및 지도 등 교육 내용에 적합한 다양한 교육 방식이 사용되었다. 학부나 수련 과정에서 받아보지 못한 내용을 실제 임상에서 수행할 수 있게 하기 위해서는 강의 위주의 교육보다는 실무 위주, 사례 중심, 토론회 교육이 효과적이다(21).

셋째, 강사 구성 측면에서는 의사, 간호사, 사회복지사, 영적돌봄자, 심리 상담가, 음악치료사 등 각 분야의 전문가들로 강사진이 구성되었다. 호스피스에 대해 다양한 관점에서 강의가 진행되어 다학제적 접근에 대한 이해를 높이는 데 도움이 되었을 것으로 추정된다.

넷째, 참여자의 측면에서는 교육 대상자 모두가 호스피스 영역에서 활동 중이거나 활동 예정인 현직 음악치료사들로 이루어졌다. 교육 과정 전반에 걸쳐 상호 간에 깊은 이해와 동질감이 형성될 수 있었으며 이를 바탕으로 토의, 역할연기 등 대상자의 높은 참여도와 활발한 상호 피드백이 요구되는 교육 과정들이 효과적으로 진행될 수 있었던 것으로 판단된다.

교육 참여 음악치료사들이 평가한 높은 효과와 만족도에도 불구하고 본 연구는 다음과 같은 한계점이 있다.

첫째, 교육 과정을 통해 다루고자 했던 범위에 비해 교육 시간이 부족했다. 오리엔테이션과 수료식을 포함하여 32시간으로 호스피스와 음악치료 교육을 모두 구성하였으나, 이는 96시간으로

이루어진 미국의 HPMT 교육과정 대비 1/3 수준이며, 호스피스 전반을 다루는 60시간의 표준교육과 비교해도 절반 수준에 불과하다. 본 교육 과정은 호스피스 음악치료 경력이 2~3년 이내인 초보 음악치료사에게 적합한 수준으로 판단된다. 환자와 가족의 다양한 의학적, 심리적, 정서적, 영적, 사회적 요구를 연령에 맞는 방식으로 음악치료를 사용하여 해결할 수 있는 중재 역량을 갖춘 호스피스 음악치료사(22)를 양성하기 위해서는 세부 영역별 심화 교육 과정이 필요할 것으로 사료된다.

둘째, 교육에 대한 평가가 교육 자체에 대한 자기평가로만 이루어졌다. 본 교육의 궁극적인 목표는 호스피스에 대한 이해와 음악치료 중재 역량을 갖춘 호스피스 전문 음악치료사의 양성이다. 호스피스 음악치료사로서의 중재 역량이 어느 정도나 향상되었는지 환자와 기관의 관점에서 평가가 이루어질 필요가 있다. 지식, 자신감 그리고 준비정도의 향상이 임상현장에서의 중재 역량 향상으로 이어질 수 있도록 현장의 평가를 반영하여 교육 과정을 지속적으로 개선하고 발전시켜야 한다.

호스피스 서비스 향상을 위해서는 전문적인 지식과 기술을 가진 인력이 필요하다(23). 또한 교육 프로그램을 성공적으로 실행하기 위해서는 교육 프로그램을 담당할 교육자를 위한 교육이 선행되어야 한다(19). 호스피스 대상자에 대한 이해를 바탕으로 분석적이고 체계적인 절차에 따라 환자와 가족의 필요를 사정하고 이를 음악치료 중재 안에서 해결할 수 있는 역량을 갖춘 호스피스 전문 음악치료사를 양성하기 위해서는 양성 목표와 계획을 구체적으로 수립하고 양성 교육을 지속적으로 실행해 나가야 한다.

## 요약

**목적:** 호스피스 전문 음악치료사 양성을 위해 교육 프로그램을 개발하고 그 수행 결과를 평가하기 위함이다.

**방법:** 교육 프로그램은 호스피스 이론, 호스피스 음악치료 이론과 실습으로 구성하였다. 교육은 매주 8시간씩 4주 과정으로 진행되었으며 33명의 음악치료사가 교육을 수료하였다. 양성과정의 효과를 확인하기 위하여 교육 전·후 호스피스 음악치료 지식 및 자신감 정도, 그리고 호스피스 음악치료 수행을 위한 준비정도를 측정하였으며, 교육 종료 후 양성과정에 대한 만족도를 조사하였다. 자료처리는 SPSS 18.0 Version으로 하였으며, 교육 효과 검증은 대응표본 t검증(Paired t-test)을 사용하였다.

**결과:** 교육을 수료한 음악치료사들은 ‘호스피스 이론’, ‘호스피스 음악치료 이론’, ‘호스피스 음악치료 실습’ 모든 영역에서 지식( $P < 0.001$ ) 및 자신감( $P < 0.001$ )의 유의미한 향상이 있는 것으로 나타났으며, 호스피스 음악치료 준비정도( $P < 0.001$ )에서도 유의미한 향상을 보였다. 강의 만족도는 5점 리커트척도를 사용하였고, 모든 강의

영역의 평균이 4점(그렇다)을 넘어 강의 만족도 수준이 대부분 양호한 것으로 확인되었으며, ‘음악치료 이론’, ‘음악치료 실습’, ‘호스피스 이론’의 순으로 강의에 대하여 높은 만족도를 보이는 것으로 확인되었다.

**결론:** 호스피스 전문 음악치료사 양성과정의 교육 프로그램은 교육의 효과가 긍정적이며 강의 만족도가 높아 호스피스 음악치료사 양성에 적합한 것으로 사료된다. 환자와 가족들에게 보다 질 높은 음악

치료 서비스를 제공하기 위해서는 양성과정을 지속적으로 운영하여 역량 있는 음악치료사를 꾸준히 양성해야 하며, 교육 내용이 다양한 임상 현장에 효과적으로 적용될 수 있도록 표준화 하여 보급해야 한다.

**중심단어:** 음악치료, 호스피스 돌봄, 완화의료, 교육

## REFERENCES

1. Status and statistics [Internet]. Goyang: Hospice and Palliative Care; c2019 [cited 2019 Dec 02]. Available from: [http://hospice.cancer.go.kr/pain/stat.do?menu\\_no=634&brd\\_mgrno=](http://hospice.cancer.go.kr/pain/stat.do?menu_no=634&brd_mgrno=).
2. The 1st comprehensive plan of hospice care and life-sustaining treatment (2019~2023) [Internet]. Sejong: Ministry of Health and Welfare; c2019 [cited 2019 Dec 02]. Available from: [https://www.mohw.go.kr/react/al/sal0301vw.jsp?PAR\\_MENU\\_ID=04&MENU\\_ID=0403&CONT\\_SEQ=349863](https://www.mohw.go.kr/react/al/sal0301vw.jsp?PAR_MENU_ID=04&MENU_ID=0403&CONT_SEQ=349863).
3. Regulation for Criteria for Providing Reimbursed Services in the National Health Insurance [Internet]. Sejong: Korea Ministry of Government Legislation; c1997~2019 [cited 2019 Dec 02]. Available from: <http://www.law.go.kr/lsInfoP.do?lsiSeq=211133&efYd=20191101>.
4. Yoon MY. A study on the present condition of qualification procedures of music therapist in Korea and the comparison with qualification procedures in other countries [master's thesis]. Seoul: Sungshin Women's Univ.; 2014. Korean.
5. Lee CH. Study on policy for activating music therapy as complementary and alternative medicine [master's thesis]. Seoul: Chung-Ang Univ.; 2017. Korean.
6. Baek YH. Experience of growth through difficulties among music therapists who work in hospice and palliative care [master's thesis]. Seoul: Ewha Woman Univ.; 2019. Korean.
7. Hilliard RE. A post-hoc analysis of music therapy services for residents in nursing homes receiving hospice care. J Music Ther 2004;41:266-81.
8. Kim EJ. Development and verification of music therapy protocol for terminal cancer patients in hospice care [dissertation]. Seoul: Hansei Univ.; 2016. Korean.
9. Kim EJ. Hospice music therapy in Korea. Korean J Hosp Palliat Care 2018;21:109-14.
10. Amy C. The effect of live music vs. taped music on pain and comfort in palliative care. Korean J Music Ther 2011;13:105-21.
11. Lee EH, Choi SE. The effects of music therapy by self-selected music listening on terminal cancer patients' affect and stress by pain level. Korean J Hosp Palliat Care 2012;15:77-87.
12. Kim TR. The necessity and direction of training professional therapists. Korean Association Music Ther 2012;1-3.
13. Kwon SH, Yang SK, Park MH, Choe SO. Assessment for the needs to develop hospice training program for nurses. Korean J Hosp Palliat Care 2008;11:147-55.
14. Nam EJ. Direction of quality improvement of hospice and palliative care. The 3rd Hospice symposium; 2019 Oct 16; Seoul, Korea. Seoul: Korean Society for Hospice and Palliative Care; 2019.
15. Cohen J. Statistical power analysis for the behavioral sciences. 2nd ed. Hillsdale, NJ: Erlbaum; 1988.
16. Hospice and Palliative Care Music Therapy Institute [Internet]. Florida: The Center for Music Therapy in End of Life Care; c2019 [cited 2019 Dec 28]. Available from: <http://www.hospicemusictherapy.org/about/course-descriptions/hospice-palliative-care>.
17. Standard curriculum of hospice and palliative care education [Internet]. Goyang: Hospice and Palliative Care; c2019 [cited 2020 Jan 25]. Available from: <http://hospice.cancer.go.kr/education/educationIntro.do>.
18. Kim EJ, Choi YS, Kim WC, Kim KS. The current status of music therapy centered on 54 hospice and palliative care settings designated by the ministry of health and welfare in 2014. J Music Human Behavior 2016;13:19-40.
19. Kang JA, Yoo YS, Park JN, Kim WC, Nam EJ, Koh SJ, et al. The effects of the pilot program in standard curriculum of hospice and palliative care education. Korean J Hosp Palliat Care 2008;11:206-12.
20. Choi GH, Kwon SH. The effects of the hospice and palliative care education program for caregivers. Korean J Hosp Palliat Care 2018;21:33-9.
21. Kim SH, Choi YS, Shin SW, Chong MK, Lee SN, Lee SW, et al. Development of education program for physicians based on the 2004 hospice palliative model project for terminal cancer. Korean J Hosp Palliat Care 2006;9:67-76.
22. Hilliard RE. Hospice and palliative care music therapy: a guide to program development and clinical care. Cherry Hill, NJ: Jeffrey Books; 2005.
23. Choi ES, Yoo YS, Kim HS, Lee SW. Curriculum development for hospice and palliative care nurses. Korean J Hosp Palliat Care 2006;9:77-85.
